# Supplementary material for: Stable CO anti-poisoning and high durability of a Pt electrocatalyst supported on carbon nanotubes
Source: Royal Society of Chemistry journal article supplement (doi:10.1039/c7ra07331c), 2017-01-01
Supplement: c7ra07331c1.pdf [file c7ra07331c1.pdf]

## Supporting Information

for

### **Stable CO anti-poisoning and High Durability of Pt electrocatalyst Supported on Carbon Nanotubes**

Jiuxiao Sun<sup>a#</sup>, Xinxin Yu<sup>b#</sup>, Quan Zhang<sup>b</sup>, Ying Ling<sup>b</sup>, and Zehui Yang<sup>b\*</sup>

*<sup>a</sup>College of Materials Science and Engineering, Wuhan Textile University, Fangzhi  
RD, Wuhan, 430200, China*

*<sup>b</sup>Sustainable Energy Laboratory, Faculty of Materials Science and Chemistry, China  
University of Geosciences Wuhan, 388 Lumo RD, Wuhan, 430074, China*

<sup>#</sup>These authors equally contributed to this work.

To whom correspondence should be addressed:

E-mail: yeungzehui@gmail.com

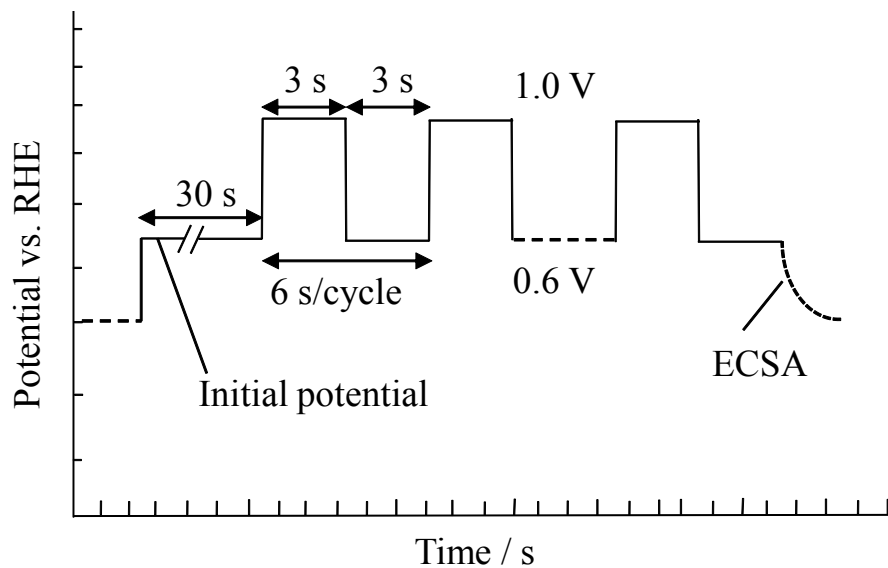

**Figure S1** New test protocol of the Pt stability test in half-cell proposed by the Fuel Cell Commercialization Conference of Japan (FCCJ).

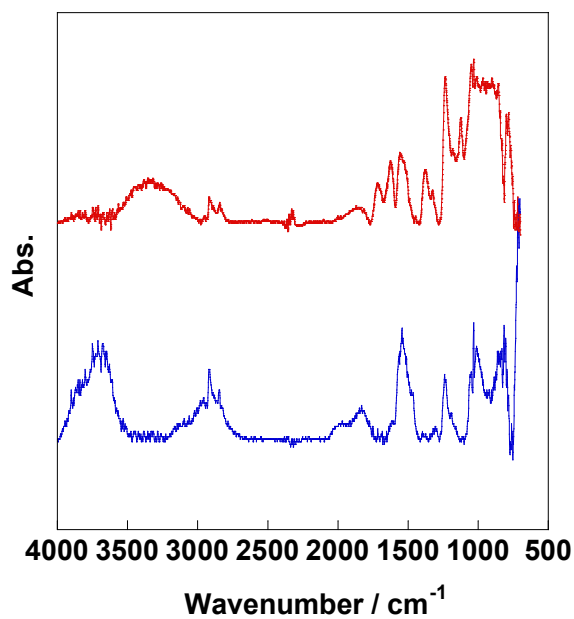

**Figure S2** FT-IR spectra of CNT/PVP/Pt (blue line) and CNT/PVP/Pt/ABPBI (red line) electrocatalysts.

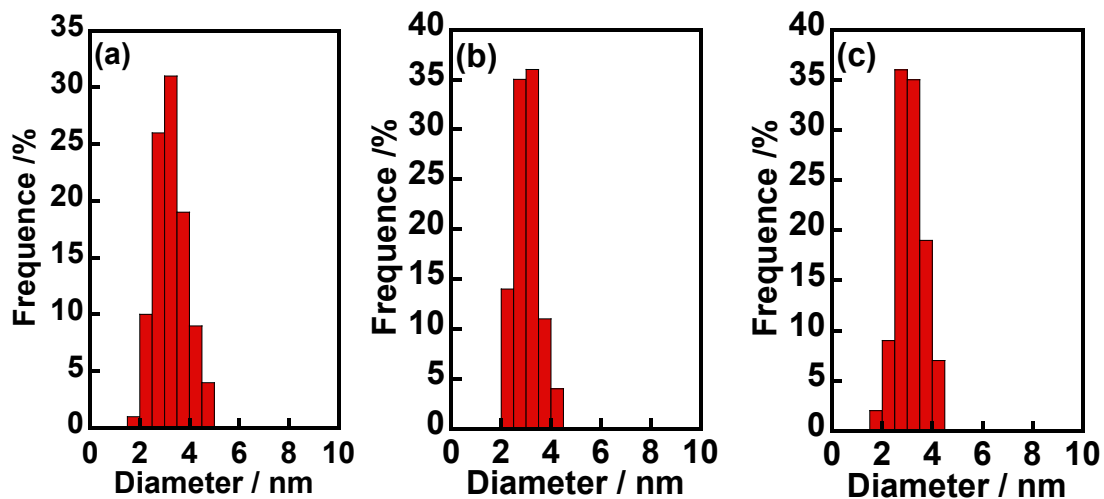

**Figure S3** Histograms of Pt size distributions of commercial CB/Pt (a), CNT/PVP/Pt (b) and CNT/PVP/Pt/ABPBI (c) before durability test.

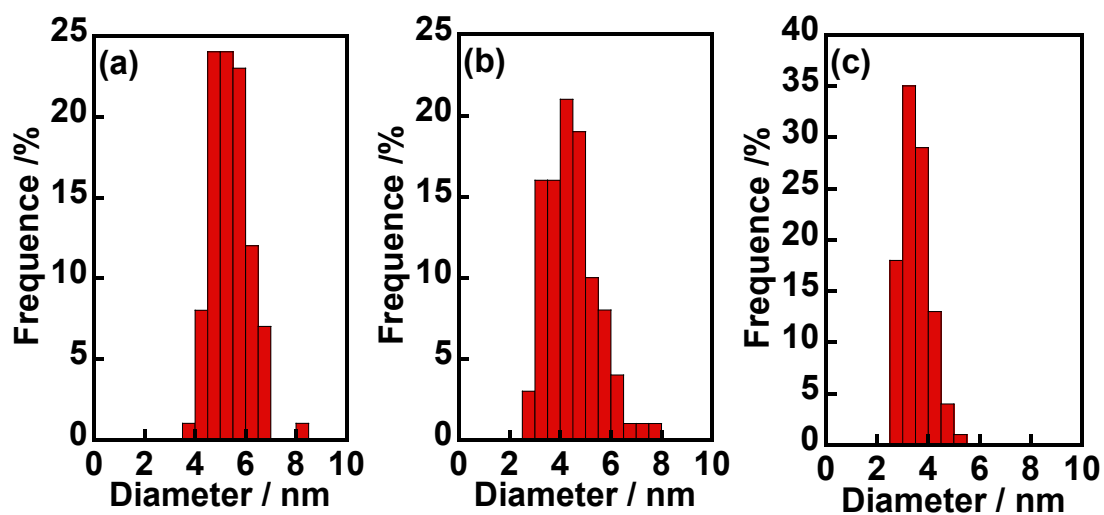

**Figure S4** Histograms of Pt size distributions of commercial CB/Pt (a), CNT/PVP/Pt (b) and CNT/PVP/Pt/ABPBI (c) after durability test.
